# Supplementary material for: Improving cancer care for underserved populations in an academic and community practice setting: protocol for a community health worker pilot navigation programme
Source: PubMed Central journal article supplement — BMJ Open. 2022 Dec 1;12(12):e067270. doi: 10.1136/bmjopen-2022-067270 (PMC9716923; doi:10.1136/bmjopen-2022-067270), 2022-12-01

# BMJ Open

BMJ Open is committed to open peer review. As part of this commitment we make the peer review history of every article we publish publicly available.

When an article is published we post the peer reviewers' comments and the authors' responses online. We also post the versions of the paper that were used during peer review. These are the versions that the peer review comments apply to.

The versions of the paper that follow are the versions that were submitted during the peer review process. They are not the versions of record or the final published versions. They should not be cited or distributed as the published version of this manuscript.

BMJ Open is an open access journal and the full, final, typeset and author-corrected version of record of the manuscript is available on our site with no access controls, subscription charges or pay-per-view fees (<http://bmjopen.bmj.com>).

If you have any questions on BMJ Open's open peer review process please email [info.bmjopen@bmj.com](mailto:info.bmjopen@bmj.com)

# BMJ Open

## Improving Cancer Care for Underserved Populations in an Academic and Community Practice Setting: A Protocol for a Community Health Worker Pilot Navigation Program

|                               |                                                                                                                                                                                                                                                                                                                                                                                                                                                                                                                                                                                                                                                                                                                                                 |
|-------------------------------|-------------------------------------------------------------------------------------------------------------------------------------------------------------------------------------------------------------------------------------------------------------------------------------------------------------------------------------------------------------------------------------------------------------------------------------------------------------------------------------------------------------------------------------------------------------------------------------------------------------------------------------------------------------------------------------------------------------------------------------------------|
| Journal:                      | <i>BMJ Open</i>                                                                                                                                                                                                                                                                                                                                                                                                                                                                                                                                                                                                                                                                                                                                 |
| Manuscript ID                 | bmjopen-2022-067270                                                                                                                                                                                                                                                                                                                                                                                                                                                                                                                                                                                                                                                                                                                             |
| Article Type:                 | Protocol                                                                                                                                                                                                                                                                                                                                                                                                                                                                                                                                                                                                                                                                                                                                        |
| Date Submitted by the Author: | 08-Aug-2022                                                                                                                                                                                                                                                                                                                                                                                                                                                                                                                                                                                                                                                                                                                                     |
| Complete List of Authors:     | Suen, Jonathan; Johns Hopkins University, School of Nursing; Johns Hopkins University Bloomberg School of Public Health<br>Parrillo, Elaina; Johns Hopkins University, School of Nursing<br>Hassoon, Ahmed; Johns Hopkins Medicine; Johns Hopkins University Bloomberg School of Public Health<br>Peairs, Kimberly ; Johns Hopkins Medicine Sidney Kimmel Comprehensive Cancer Center; Johns Hopkins Medicine<br>Stanford, Olivia; Johns Hopkins Medicine Sidney Kimmel Comprehensive Cancer Center; Johns Hopkins Medicine<br>Wenzel, Jennifer; Johns Hopkins University, School of Nursing; Johns Hopkins Medicine Sidney Kimmel Comprehensive Cancer Center<br>Zabora, James; Johns Hopkins Medicine<br>Dobs, Adrian; Johns Hopkins Medicine |
| Keywords:                     | ONCOLOGY, Adult oncology < ONCOLOGY, PUBLIC HEALTH                                                                                                                                                                                                                                                                                                                                                                                                                                                                                                                                                                                                                                                                                              |
|                               |                                                                                                                                                                                                                                                                                                                                                                                                                                                                                                                                                                                                                                                                                                                                                 |

SCHOLARONE™  
Manuscripts

1  
2  
3 **Improving Cancer Care for Underserved Populations in an Academic and Community**  
4 **Practice Setting: A Protocol for a Community Health Worker Pilot Navigation Program**  
5  
6  
7

8 \* Jonathan J. Suen AuD <sup>1,2</sup> (ORCID: 0000-0003-3658-7459)  
9

10 \* Elaina Parrillo BSN, RN <sup>1</sup> (ORCID: 0000-0001-6824-0017)  
11

12 Ahmed Hassoon MD, MPH <sup>3,6</sup>  
13

14 Kimberly S. Peairs MD <sup>4,5</sup>  
15

16 Olivia Stanford BS, BA <sup>5,6</sup>  
17

18 Jennifer Wenzel PhD, RN, CCM, FAAN <sup>1,5,6</sup>  
19

20 James Zabora ScD, MSW <sup>6</sup>  
21

22 Adrian Dobs MD, MHS <sup>6</sup>  
23

24 \* *Co-first authors*  
25  
26  
27

28 <sup>1</sup> Johns Hopkins University School of Nursing (Baltimore, Maryland, USA).  
29

30 <sup>2</sup> Cochlear Center for Hearing and Public Health, Johns Hopkins University Bloomberg School of  
31 Public Health (Baltimore, Maryland, USA).  
32

33 <sup>3</sup> Division of Cardiovascular and Clinical Epidemiology, Johns Hopkins University Bloomberg  
34 School of Public Health (Baltimore, Maryland, USA).  
35

36 <sup>4</sup> Division of General Internal Medicine, Johns Hopkins University School of Medicine,  
37 (Baltimore, Maryland, USA)  
38

39 <sup>5</sup> Johns Hopkins Sidney Kimmel Comprehensive Cancer Center, (Baltimore, Maryland, USA)  
40

41 <sup>6</sup> Johns Hopkins University School of Medicine (Baltimore, Maryland, USA).  
42  
43  
44  
45  
46  
47  
48

49 **Word Count:** 3,663  
50

51 **Corresponding Author:** Jonathan J. Suen, AuD ([suen@jhmi.edu](mailto:suen@jhmi.edu))  
52

53 **Postal Address:** Johns Hopkins University School of Nursing  
54  
55 525 N Wolfe St, Baltimore, MD 21205 (USA)  
56  
57  
58

## ABSTRACT

**Introduction:** Delaying initial cancer treatment following first diagnosis impacts health outcomes, including increasing patient distress and odds of mortality. Interventions to promote timely health care engagement may decrease patient-reported stress and improve quality of life. Community health workers (CHWs) delivering problem-solving interventions represent an *enabling resource* for reducing delays in attending a patient's initial oncology treatment visit. We will implement a pilot CHW navigation program that guides patients and their caregivers in problem orientation and problem-solving for engaging their health care. We aim to understand how the program influences patients' health care utilization within the period between their first diagnosis to initial treatment visit.

**Methods and Analysis:** We will employ a hybrid implementation design to introduce the CHW navigation program at the centralized call center for the Johns Hopkins Sidney Kimmel Comprehensive Cancer Center (SKCCC). CHW team members will use a consecutive sampling approach and call all eligible patients with cancer diagnoses. Participants will identify their cancer-related problems through the Problem-Checklist and CHWs will provide guidance by sharing relevant information. We will evaluate patients' time to initial oncology treatment and health care utilization through reviewing data from the electronic medical records at three- and six-months post-intervention. Bivariate analyses will be completed to evaluate the relationships between receiving the program and all outcome measures. We will employ independent t-tests to assess the program's impact on participant stress, quality of life, number of problems reported, and health care utilization.

**Ethics and Dissemination:** This study's protocol was thoroughly reviewed and approved by the Johns Hopkins School of Medicine's institutional review board (IRB). Dissemination planning is ongoing through regular meetings between members of the investigator team and public members of a long-established community advisory group (CAG). Study plans include

1  
2  
3  
4  
5  
6  
7  
8  
9  
10  
11  
12  
13  
14  
15  
16  
17  
18  
19  
20  
21  
22  
23  
24  
25  
26  
27  
28  
29  
30  
31  
32  
33  
34  
35  
36  
37  
38  
39  
40  
41  
42  
43  
44  
45  
46  
47  
48  
49  
50  
51  
52  
53  
54  
55  
56  
57  
58  
59  
60

collaborating with other experts at the Johns Hopkins Medical Institutions for ideating dissemination strategies.

**Keywords:** cancer, community health workers, health equity, patient navigation, quality of life

For peer review only

## STRENGTHS AND LIMITATIONS OF THIS STUDY

- *Limitation:* The target sample would be a heterogeneous population given the lack of an exclusion criterion based on cancer type
- *Limitation:* The pilot intervention was developed within the unique infrastructure of the Johns Hopkins Sidney Kimmel Comprehensive Cancer Center (SKCCC), and the intervention design may therefore be neither feasible nor acceptable within other health care systems and patient populations, respectively
- *Strength:* The pilot intervention was translated from an established model of care (i.e., community health worker) with robust evidence in the scientific literature showing efficacy in addressing a variety of health conditions among populations that are underserved
- *Strength:* Our targeted sampling strategy, based upon assessing area deprivation index scores, will direct priority attention to populations residing in local zip codes with higher levels of poverty, substandard housing, and unemployment
- *Strength:* The study design and implementation plan emerged through partnership and collaboration between academic investigators and members from a long-established community advisory group (CAG)

## BACKGROUND

Reliable health care utilization during the period between a cancer diagnosis and receiving initial treatment is crucial for facilitating favorable outcomes. Prolonging the start of treatment leads to poorer outcomes such as patient distress, worsening the progression of disease, and increasing the odds of mortality [1–3]. The average length of time for receiving initial cancer treatment has increased over the years, highlighting a public health concern warranting attention. Khorana et al. found a 38% increase in the time to initial cancer treatment following diagnosis across all cancer types in the United States between 2004-2013, using data from the National Cancer Database [2]. Additionally, patients who identified as Black experienced longer times to initial treatment compared to white counterparts across cancer types [2]. Although the exact cause of this increase in time to initial treatment following first cancer diagnosis is unclear, this delay is likely influenced by a combination of patient- and system-level factors [1,4].

Andersen's behavioral model for health care utilization can guide investigators' understanding of how patient- and system-level factors can affect timely access for initiating cancer treatments [5]. This model posits that patients' health care utilization is a function of joint factors across the environment, including the health care system, along with population- and individual-level patient characteristics that either enables or impedes certain health behaviors and use of health services [5]. This in turn is theorized to impact health outcomes adversely. Therefore, the model may inform novel program designs for reaching underserved demographics. This includes patients with low income and/or from minoritized racial backgrounds who may otherwise face higher risks for unfavorable outcomes due to structural and/or other social barriers associated with the environment and/or population characteristics [5].

1  
2  
3 In Andersen's behavioral model (Figure 1), *enabling resources* are key components for  
4 supporting and promoting timely treatment initiation and health care utilization by patients. One  
5 *enabling resource* for patients and their caregivers are community health worker (CHW) models  
6 of care, which commonly includes trained lay individuals or paraprofessionals who serve as  
7 important linkages between patient populations and health care systems [6,7]. Some examples  
8 of public health programs adapting CHW models include community-based interventions for  
9 improving breast and cervical cancer screenings among Korean American women [8], health  
10 service outreach for residents with history of stroke and hypertension in Harlem, New York [9],  
11 and providing a socially accessible hearing care program for older adults with hearing loss and  
12 low-to-moderate income in Baltimore, Maryland [10]. Evidence gathered through a prior  
13 systematic review of CHW-directed interventions reported treatment efficacy when compared  
14 with certain conventional models of health care and were cost-effective for managing certain  
15 health conditions [11]. Trained CHWs often share varied degrees of either language, culture,  
16 lived experiences, and/or geographic characteristics with their patient populations. The social  
17 concordance between CHWs and patient populations is a hallmark feature of CHW-directed  
18 programs, which can be optimized for providing patient-centered services [12]. Health systems,  
19 particularly ones with community-based partnerships like the Johns Hopkins Sidney Kimmel  
20 Comprehensive Cancer Center (SKCCC) [13], can therefore also leverage CHW models as an  
21 *enabling resource* for addressing public health disparities [14].  
22  
23  
24  
25  
26  
27  
28  
29  
30  
31  
32  
33  
34  
35  
36  
37  
38  
39  
40  
41  
42  
43  
44

45 The goal of the CHW navigation program is to focus on problem-solving in navigating the  
46 health care system. Prior studies of interventions focused on problem orientation and problem-  
47 solving with cancer patients and their caregivers have yielded evidence of promoting self-  
48 efficacy in managing care and in reducing stress [15–18]. From adapting Andersen's behavioral  
49 model [5], we theorize a relationship between the promotion of these outcomes and the  
50 activation of health behaviors that facilitate more timely treatment initiation. The problem-solving  
51  
52  
53  
54  
55  
56  
57  
58  
59  
60



1  
2  
3 pilot intervention will be implemented at the systems-level and all cancer patients ages 18 years  
4 and older are eligible as prospective service users. The Johns Hopkins Hospital system (JHH)  
5 includes the SKCCC, which has a centralized call center for scheduling appointments  
6 regardless of cancer type and JHH provider team. Working through the SKCCC allows the  
7 intervention team to reach a broader range of new patients with various cancer diagnoses.  
8  
9  
10  
11  
12

13  
14 Our protocol manuscript describes a pilot program for assessing how the implementation  
15 of a CHW navigation program, focusing on problem-solving, will influence patients' treatment  
16 initiation and health care utilization for cancer treatment and care. We hypothesize that  
17 implementing the program would decrease the time leading up to the patient's initial oncology  
18 treatment visit following their first cancer diagnosis. Secondary hypotheses include observing an  
19 increase in the total number of oncology provider visits (e.g., patient retention), improvements in  
20 self-reported quality of life, and a decrease in the number of emergency department visits,  
21 hospitalizations, missed oncology appointments, reported stress, and premature mortality  
22 attributed to delaying care.  
23  
24  
25  
26  
27  
28  
29  
30  
31  
32

## 33 34 **METHODS AND ANALYSIS**

### 35 36 **Study Design and Hypotheses**

37  
38  
39 This pilot study will be a pre-test/post-test, hybrid effectiveness-implementation type-1  
40 research design [19,20]. This design will primarily evaluate the effectiveness of the pilot CHW  
41 navigation program in facilitating patients' initiation of cancer treatment, health care utilization  
42 for oncology care, and perceived health status (patient stress and quality of life). Objectives of  
43 the pilot study include assessing the technical and administrative feasibility and acceptability of  
44 program implementation for informing a larger-scale intervention study in the future. Features of  
45 the current pilot program, such as recruitment strategies, adherence to protocol, and selected  
46 questionnaires will also be evaluated both for effective reach of the target population and for  
47  
48  
49  
50  
51  
52  
53  
54  
55  
56  
57  
58  
59  
60

1  
2  
3 logistic feasibility. The following hypotheses will assess the impact of the pilot CHW navigation  
4  
5 program:

6  
7  
8 1) The CHW navigation program will promote initiation of cancer treatment following the  
9  
10 patient's first cancer diagnosis.

11  
12  
13 1a) The program will *decrease* time leading up to the initial oncology treatment visit.

14  
15  
16 2) The CHW navigation program will optimize patient's health care utilization for recommended  
17  
18 cancer care and treatment.

19  
20  
21 2a) The program will *decrease* the number of emergency department visits,  
22  
23 hospitalizations, and missed oncology appointments.

24  
25  
26 2b) The program will *increase* the total number of provider-*recommended* oncology  
27  
28 visits (mitigating health care *overutilization*).

29  
30  
31 3) The CHW navigation program will improve patients' perceived health status.

32  
33  
34 3a) The program will *decrease* patient-reported stress.

35  
36  
37 3b) The program will *increase* patient-reported quality of life.

### 38 39 40 **Study Setting and Sample**

41  
42  
43 We will implement a CHW-directed navigation program among patients newly diagnosed  
44  
45 with cancer. Health disparities within Baltimore City are well-documented with population life  
46  
47 expectancies across local zip codes differing by as much as 20 years [21]. Patients will be  
48  
49 consecutively sampled from nine zip codes in East Baltimore (21202, 21205, 21206, 21212,  
50  
51 21213, 21218, 21224, 21231, and 21239). These areas within East Baltimore show high  
52  
53 incidences of cancer mortality and area deprivation index scores. Area deprivation index scores  
54  
55 are calculated using sociodemographic characteristics of a neighborhood. Individuals living in  
56  
57  
58  
59  
60

1  
2  
3 neighborhoods with high area deprivation scores experience higher levels of poverty,  
4  
5 substandard housing, unemployment, and lower levels of educational attainment. Areas with  
6  
7 higher scores are also associated with higher mortality rates [22].  
8  
9

10 Patients will be eligible to participate if they present with their first cancer diagnosis and  
11  
12 are over 18 years old. Patients must be seeking cancer care in the JHH system and have  
13  
14 previously contacted the SKCCC for an appointment. Recruitment will follow a consecutive  
15  
16 sampling strategy [23], and all eligible patients will be contacted by phone for study recruitment  
17  
18 by a two-member CHW team affiliated with the SKCCC. Through the review of JHH Epic  
19  
20 electronic medical health record data, there are approximately 2,155 SKCCC patients that may  
21  
22 be eligible to participate in the study as a user of this health service.  
23  
24

### 25 **Patient and Public Involvement in Research**

26  
27  
28 The SKCCC prioritizes community engagement strategies for outreach and improving  
29  
30 public trust in medical care [13]. The investigator team maintains a partnership with two  
31  
32 community advisory groups (CAGs) coordinated by the SKCCC based in Baltimore City and  
33  
34 Prince George's County (Maryland), respectively, that were established over ten years ago  
35  
36 [24,25]. The CAGs meet monthly and form stakeholders from across the continuum of cancer  
37  
38 care, including cancer survivors, caregivers, and representatives from local health departments,  
39  
40 community-based organizations, and local faith-based communities. While CAG meetings are  
41  
42 hosted by the SKCCC, their respective priorities and agendas are self-directed and self-  
43  
44 managed by its membership. The CAGs contribute to research and practice through advising  
45  
46 clinicians and researchers at SKCCC about patient and caregiver needs such as barriers in  
47  
48 accessing care and priority outcomes [13]. Members are invited to weigh in on study designs,  
49  
50 implementation plans, approaches in data analysis and interpretation, and the dissemination of  
51  
52 study results.  
53  
54  
55  
56  
57  
58  
59  
60

1  
2  
3 Approximately three months prior to implementing the CHW navigator pilot program,  
4  
5 investigators from the National Cancer Institute (NCI)-supported Johns Hopkins Center to  
6  
7 Reduce Cancer Disparities (JHCRCD) began engaging the CAGs about the current program  
8  
9 following members' reports of unique challenges in accessing care following the first cancer  
10  
11 diagnosis. The CAGs also identified issues related to maintaining contact with a care team and  
12  
13 a lack of transportation as barriers to care and contributors to increased stress levels, which  
14  
15 directly informed the current study's priorities, outcomes of interest (stress and quality of life),  
16  
17 and intervention development. The investigator team continues to meet regularly with the CAGs,  
18  
19 who in turn also support recruitment efforts by promoting the study within their respective social  
20  
21 networks.  
22  
23

### 24 **Intervention: Community Health Worker (CHW) Navigation Program**

25  
26  
27 The CHW navigation program will be provided to patients and caregivers to address  
28  
29 cancer care-related problems and questions during the period between the patient's first cancer  
30  
31 diagnosis and their initial treatment visit. The CHW navigation program adopts the C.O.P.E  
32  
33 model to provide patients and caregivers with relevant guidance and expert information. The  
34  
35 C.O.P.E. model includes four principles: Creativity, Optimism, Planning, and Expert information.  
36  
37 It focuses on social problem-solving for both the patient and family caregiver(s) to optimize  
38  
39 problem orientation and problem-solving [15,17,18]. The C.O.P.E. model has been widely  
40  
41 documented in the scientific literature with oncology patients and their caregivers to assist with  
42  
43 problem solving. The CHW navigation program incorporates these principles of C.O.P.E. to  
44  
45 empower and engage patients and caregivers in their care. The implementation of the CHW  
46  
47 navigation program is intended to influence patient health care utilization, as well as stress and  
48  
49 quality of life.  
50  
51

52  
53 The CHW team from SKCCC will contact eligible patients or their caregivers to assess  
54  
55 patient interest in participating before obtaining informed consent. Upon enrolling, the CHWs will  
56  
57  
58  
59

1  
2  
3 ask patients a series of varied questions dependent on whether the patient already received a  
4 confirmed diagnosis via biopsy report. For patients who do not have a biopsy-confirmed  
5 diagnosis on record, the CHW will facilitate scheduling a provider visit for ordering a biopsy, as  
6 needed, and direct patients to the appropriate JHH department for follow-up care (e.g., Surgery,  
7 Medical Oncology, or Radiation Therapy). The patient can leave the navigation program if they  
8 decide to seek cancer care elsewhere, or if the CHW is unable to meet the patient's specific  
9 needs at that time.  
10  
11  
12  
13  
14  
15  
16  
17

18  
19 Alternatively, CHWs will focus on scheduling the initial appointment with oncology for  
20 patients who have a biopsy-confirmed diagnosis on record. During a call, the CHW will identify  
21 any barriers inhibiting the patient from scheduling their first oncology visit. This may include  
22 logistical barriers, such as a lack of transportation, childcare, or understanding how to use  
23 MyChart, an online personal health record system used to schedule appointments, view  
24 medications and test results, and connect with providers. The CHW may also identify psycho-  
25 emotional barriers, such as fear, mistrust, or a lack of support. After the CHW identifies these  
26 barriers, they will connect the patient with the appropriate online community resources from  
27 Johns Hopkins Electronic Resource databases. The CHW may initiate discussions for  
28 scheduling either an in-home or office visit for the patient's initial oncology treatment. CHWs will  
29 anticipate and prepare for multiple phone calls with patients presenting with more complex  
30 needs to provide sufficient information and navigation support.  
31  
32  
33  
34  
35  
36  
37  
38  
39  
40  
41  
42  
43  
44

### 45 **Outcome of Interests**

46  
47 The primary outcome is time to the initial treatment visit following a cancer diagnosis.  
48 Secondary outcome variables include health care utilization at three- and six-months after the  
49 completion of the program, cost of care, number of problems resolved, number of community  
50 resources used, stress, and quality of life. The accessibility and feasibility of the program will be  
51 assessed by the established CAGs through semi-structured discussions. Members from the  
52  
53  
54  
55  
56  
57  
58  
59  
60

CAGs vetted all proposed questionnaires and procedures before receiving formal approval from a research ethics review board and the project sponsor. See Table 1 for specific short- and long-term outcome variables.

**Table 1.** Short- and Long-Term Outcome Variables.

|                                                                                                                                                                        | Variable                                            | Measurement                                                                        |
|------------------------------------------------------------------------------------------------------------------------------------------------------------------------|-----------------------------------------------------|------------------------------------------------------------------------------------|
| <b>Short-Term Outcome<sub>1</sub></b>                                                                                                                                  | Cancer Related-Problem                              | Problem-Checklist (25-item)                                                        |
|                                                                                                                                                                        | Stress                                              | Chronic Illness Distress Scale (7-item)                                            |
|                                                                                                                                                                        | Quality of Life                                     | Satisfaction with Life Domains (16-item)                                           |
| <b>Long-term Outcome<sub>2</sub></b>                                                                                                                                   | Time to first oncology treatment visit <sub>3</sub> | Time to first oncology treatment visit following patient's cancer-confirmed biopsy |
|                                                                                                                                                                        | Healthcare Utilization <sub>3</sub>                 | Number of ED visits                                                                |
|                                                                                                                                                                        |                                                     | Number of hospitalizations                                                         |
|                                                                                                                                                                        |                                                     | Length of hospital stay                                                            |
|                                                                                                                                                                        |                                                     | Mortality                                                                          |
|                                                                                                                                                                        | Cost of Care <sub>3</sub>                           | Number of oncology visits (telehealth/in-person)                                   |
|                                                                                                                                                                        |                                                     | Number of missed oncology visits                                                   |
|                                                                                                                                                                        | Pharmacy charges                                    |                                                                                    |
|                                                                                                                                                                        | Radiology charges                                   |                                                                                    |
| <sub>1</sub> During CHW Navigation Program Contact; <sub>2</sub> Three-Month and 6-Month post-program; <sub>3</sub> Data provided from Epic (electronic health record) |                                                     |                                                                                    |

## Instruments

The time to initial oncology treatment visit and health care utilization data will be obtained from Epic, an electronic medical record database. Time to initial oncology treatment visit is defined as the time from the patient's biopsy-confirmed diagnosis to their first oncology

1  
2  
3 treatment. Health care utilization encompasses the number of oncology visits (via telehealth or  
4 in-person), missed oncology visits, emergency department (ED) visits, hospitalizations and  
5 length of hospital stay, and patient mortality. The cost of care (e.g., pharmacy and radiology  
6 charges) will also be measured with data from Epic.  
7  
8  
9  
10

11  
12 The Problem-Checklist is a 25-item inventory of problems cancer patients have reported  
13 during and after diagnosis and treatment. The Problem-Checklist will assist in identifying  
14 problems to focus on during the intervention. To measure quality of life, the patient will complete  
15 the Satisfaction with Life Domains Scale (16-items). The scale uses a seven-point Likert rating  
16 system, ranging from 1 (most satisfied) to 7 (most dissatisfied). This scale was previously used  
17 with breast cancer survivors and patients who received bone marrow transplants and were  
18 positively received by both patient populations [26,27]. The Chronic Illness Distress scale will  
19 measure stress. This scale is a 16-item, four-point Likert scale ranging from *not upset* to *very*  
20 *upset*. These brief questionnaires will be completed upon entry into the program (i.e., baseline)  
21 with interim follow-up data collected at three-months and the final time point at six-months post-  
22 intervention.  
23  
24  
25  
26  
27  
28  
29  
30  
31  
32  
33  
34  
35

36 Patient sociodemographic information will be collected using a Patient Demographics  
37 Questionnaire. This questionnaire includes items about age, marital status, race/ethnicity,  
38 education, employment status, annual household income, cancer diagnosis, and time of  
39 diagnosis.  
40  
41  
42  
43  
44

#### 45 **Data Collection**

46  
47

48 Short-term outcome variables will be collected by CHW team members during the first  
49 series of phone calls with the participant. CHWs will review each questionnaire with the  
50 participant and record their responses. Each CHW will also maintain a journal of interactions  
51 with the participant, detailing the participant's problem, resources used to address the problem,  
52  
53  
54  
55  
56  
57  
58  
59  
60

1  
2  
3 who they reached and engaged (patient or informal/formal caregiver), and the number of phone  
4 calls made. All data will be secured in accordance with university policies for upholding study  
5 confidentiality. Long-term outcome variables will be collected through Epic and stored in  
6 REDCap. REDCap (Research Electronic Data Capture) is a secure, web-based software  
7 platform designed to support data capture for research studies, providing 1) an intuitive interface  
8 for validated data capture; 2) audit trails for tracking data manipulation and export procedures;  
9 3) automated export procedures for seamless data downloads to common statistical packages;  
10 and 4) procedures for data integration and interoperability with external sources [28,29]. For  
11 assessing the low-cost feature of the CHW navigation program, our team will document the  
12 resources expended during implementation such as staffing hours and costs of communication  
13 resources. We will also document the number of patients served by the program to demonstrate  
14 our reach.

### 29 **Analytic Plan**

30  
31  
32 We will collect all measures (Table 1) before and after implementing the CHW navigation  
33 program. CHWs will collect information by phone through the Problem Checklist, Chronic Illness  
34 Distress scale, and Satisfaction with Life Domains scale before providing guidance on cancer-  
35 related problem(s). Additionally, we will assess the time to the initial oncology treatment visit  
36 and health care utilization through evaluating data from Epic at three- and six-months following  
37 the program. Data analyses will occur at each timepoint of data collection (baseline and post-  
38 program; immediate, three-months, and six-months). Univariate analyses will be completed to  
39 describe the sample. Bivariate analyses will be completed to understand relationships between  
40 receipt of the program and all outcome variables. We will use independent t-tests to assess the  
41 program's impact on participant stress, quality of life, number of problems reported, and health  
42 care utilization. We will use repeated paired t-tests (under a Bonferroni correction) on the  
43 following: average pre-test to each post-test data collection point for distress, severity of  
44  
45  
46  
47  
48  
49  
50  
51  
52  
53  
54  
55  
56  
57  
58  
59  
60



1  
2  
3 symptoms, and problem-solving behaviors. Additional paired t-tests will be conducted to  
4  
5 determine if there is a difference in the same variables over time.  
6  
7

## 8 **ETHICS AND DISSEMINATION**

9

10 This study completed an ethical review through the Johns Hopkins School of Medicine's  
11 institutional review board (IRB00160610) and received initial approval on August 1, 2019. At the  
12 time of this writing (2022), the current protocol is approved through July 6, 2023, coinciding with  
13 the projected study conclusion after confronting implementation delays due to local public health  
14 guidelines introduced during the COVID-19/SARS-CoV-2 pandemic which restricted research  
15 and clinical activities at SKCCC. Discussions surrounding the study's dissemination plans are  
16 ongoing through regular meetings between members of the investigator team (JHCRCD) and  
17 members of the public (CAGs). The JHCRCD and CAGs together will also be collaborating with  
18 other entities such as the Johns Hopkins Institute for Clinical and Translational Research and  
19 the Johns Hopkins Center for Health Equity (formerly the Johns Hopkins Center to Eliminate  
20 Cardiovascular Health Disparities) [30,31], who offer additional expertise drawn from experience  
21 in forging academic-community partnerships for study conduct and disseminating findings [32].  
22  
23  
24  
25  
26  
27  
28  
29  
30  
31  
32  
33  
34  
35

## 36 **DISCUSSION**

37

38 We will implement a pilot CHW navigation program to support patient populations in  
39 Baltimore City who face higher risk of delaying initial cancer treatment visits or becoming lost to  
40 follow-up throughout the care continuum. Our sampling strategy targets residents of select  
41 urban zip codes with high area deprivation index scores where patients are more likely to  
42 confront barriers to timely health care engagement attributed to respective social determinants  
43 of health. The CHW will serve as a linkage between patients newly diagnosed with cancer and  
44 their oncology provider team at the JHH. As an *enabling resource* for supporting cancer care  
45 utilization by patient populations facing higher risks for adverse outcomes, a CHW navigation  
46  
47  
48  
49  
50  
51  
52  
53  
54  
55  
56  
57  
58  
59  
60

1  
2  
3 program also supports pathways for promoting health equity. Like other CHW models of care,  
4 the health worker does not directly provide medical consultation nor primary care. Rather, they  
5 are trained to support patients' problem-solving skills for navigating their health care, connect  
6 patients to relevant resources, and help coordinate care with the goal of reducing time to  
7 initiating treatment. Since health care utilization during the time between first diagnosis and  
8 initial treatment represents a critical period that can significantly modify health outcomes,  
9 reducing this time improves the prospects of survivorship and experiencing a better quality of  
10 life.  
11  
12  
13  
14  
15  
16  
17  
18  
19

20  
21 There will be several limitations worth noting in implementing this program. Firstly, there  
22 will be no exclusion criterion based on cancer type. This results in a heterogeneous sample of  
23 patients with varying needs; some may require several contacts with a CHW to sense adequate  
24 support while others may only require one point of contact. Secondly, only patients who have  
25 previously contacted the SKCCC will be reached, thus introducing population selection bias to  
26 consider. Inherent structural factors that impede access to health systems such as the SKCCC  
27 should also be considered when designing programs aiming to address barriers to cancer care.  
28 Furthermore, our program is connecting patients who are still early in their cancer care  
29 trajectory, and therefore may not yet be knowledgeable enough to articulate their complete  
30 needs to the CHW. However, engagements with a CHW navigator still offer an initial point of  
31 linkage to resources that patients and caregivers may access during relevant periods later in  
32 their care trajectory. Finally, the program will be operating within the context of the JHH system  
33 and therefore other institutions with different infrastructures may benefit from considering  
34 another implementation strategy.  
35  
36  
37  
38  
39  
40  
41  
42  
43  
44  
45  
46  
47  
48  
49

50  
51 Our CHW navigation program represents an innovative approach to address disparities  
52 early in cancer care and supports the odds of survivorship by leveraging a model commonly  
53 used for reaching underserved patient populations [33]. The role of the CHW has proliferated  
54  
55  
56  
57  
58  
59  
60

1  
2  
3 due to demonstrated effectiveness in community outreach, social support, informal counseling,  
4 and health education [34]. The paraprofessional workforce is associated with improved care  
5 access and reduced health care costs [6,35], particularly among socially minoritized populations  
6 [36,37]. While the CHW navigation program will be based within JHH, conducting outreach to  
7 patients who are not *yet* fully integrated within the health care system presents another unique  
8 advantage. Patients usually need to be completely onboarded before being eligible to receive  
9 navigation services by either a trained CHW or staff nurse. Our hospital based CHW, who may  
10 also be perceived as more approachable than health care staff by patients, serves as a linkage  
11 with patients in the Baltimore community *before* they spend the additional time usually needed  
12 to integrate with a health care team. Waiting for patients to be fully onboarded before receiving  
13 navigation services may otherwise risk further delaying initial treatment. The CHW navigator  
14 therefore operates within a “transitional space” for patients in their care trajectory when they  
15 may face higher risk of becoming lost to follow-up due to barriers in health care systems,  
16 including those attributable to ongoing legacies of structural racism and discrimination. A CHW  
17 navigator may also provide further assurance for a medical provider team who would know that  
18 their patients can remain better connected to vital health care through the CHW-directed  
19 service. Finally, a CHW navigation program may also represent a lower-cost approach [6,35] in  
20 reaching underserved demographics with cancer diagnoses. Resources for operating such a  
21 program include properly allocating staff hours (including time for CHW training, program  
22 delivery, and continuing education as needed), adequate workspaces, and communications  
23 equipment. Taken together, we propose our CHW navigation program for cancer care as a cost-  
24 effective approach to facilitate better outcomes for both patients, their caregivers, and the health  
25 care system.

26  
27  
28  
29  
30  
31  
32  
33  
34  
35  
36  
37  
38  
39  
40  
41  
42  
43  
44  
45  
46  
47  
48  
49  
50  
51  
52 We will pilot our novel CHW navigation program and evaluate its feasibility and  
53 acceptability among populations with recent cancer diagnoses who are traditionally underserved  
54  
55  
56  
57  
58  
59  
60

1  
2  
3 by health care systems in Baltimore City. Our program represents an *enabling resource* [5] to  
4 support health care utilization for patients and their caregivers during a critical period when  
5 initiating treatment by oncology in a timely manner is crucial for favorable outcomes. Our  
6 program protocol describes key guiding frameworks, program features, and an analytic plan that  
7 we aim to follow for implementation.  
8  
9  
10  
11  
12  
13  
14  
15  
16  
17  
18  
19  
20  
21  
22  
23  
24  
25  
26  
27  
28  
29  
30  
31  
32  
33  
34  
35  
36  
37  
38  
39  
40  
41  
42  
43  
44  
45  
46  
47  
48  
49  
50  
51  
52  
53  
54  
55  
56  
57  
58  
59  
60

## Declarations

### Competing Interests

The authors declare that they have no competing interests.

### Funding

This work was supported by the Merck Foundations Alliance to Advance Patient-Centered Cancer Care after a competitive call for Alliance projects with program oversight from a designated National Program Office within the University of Michigan School of Nursing (grant number 19-9714). The Merck Foundations Alliance provided funding for implementing project operations. JJS is supported in part by the National Institute on Aging/National Institutes of Health (grant number F31AG071353) and the Johns Hopkins Cochlear Center for Hearing and Public Health which is supported in part by a philanthropic gift from Cochlear, Ltd. The funders listed above have no role in both the conduct and outcomes of the study.

### Authors' Contributions

All authors contributed to the conceptualization of this manuscript. JJS and EP drafted the manuscript as co-first authors and all other authors contributed substantial feedback and writing for revisions, including a CHW from SKCCC (OS). AD and JZ advised the manuscript's development as co-senior authors and principal investigator (AD) of the grant awarded by the Merck Foundation.

### Acknowledgments

The authors would like to acknowledge the support of the Merck Foundation in this program of research. The authors would also like to acknowledge Dr. Debra Roter and Ms. Marielle (Mari) Bugayong for their guidance and expertise. Finally, we would also like to express

1  
2  
3 our deepest gratitude to the members of the SKCCC's community advisory groups (CAGs)  
4  
5 without whom the development of this program would not be possible.  
6  
7  
8  
9  
10  
11  
12  
13  
14  
15  
16  
17  
18  
19  
20  
21  
22  
23  
24  
25  
26  
27  
28  
29  
30  
31  
32  
33  
34  
35  
36  
37  
38  
39  
40  
41  
42  
43  
44  
45  
46  
47  
48  
49  
50  
51  
52  
53  
54  
55  
56  
57  
58  
59  
60

For peer review only

## References

- 1 Cone EB, Marchese M, Paciotti M, *et al.* Assessment of Time-to-Treatment Initiation and Survival in a Cohort of Patients With Common Cancers. *Jama Netw Open* 2020;3:e2030072. doi:10.1001/jamanetworkopen.2020.30072
- 2 Khorana AA, Tullio K, Elson P, *et al.* Time to initial cancer treatment in the United States and association with survival over time: An observational study. *Plos One* 2019;14:e0213209. doi:10.1371/journal.pone.0213209
- 3 Doubeni CA, Gabler NB, Wheeler CM, *et al.* Timely follow-up of positive cancer screening results: A systematic review and recommendations from the PROSPR Consortium. *Ca Cancer J Clin* 2018;68:199–216. doi:10.3322/caac.21452
- 4 Hanna TP, King WD, Thibodeau S, *et al.* Mortality due to cancer treatment delay: systematic review and meta-analysis. *Bmj* 2020;371:m4087. doi:10.1136/bmj.m4087
- 5 Andersen RM. Revisiting the behavioral model and access to medical care: does it matter? *J Health Soc Behav* 1995;36:1–10.
- 6 Witmer A, Seifer SD, Finocchio L, *et al.* Community health workers: integral members of the health care work force. *Am J Public Health* 1995;85:1055–8. doi:10.2105/ajph.85.8\_pt\_1.1055
- 7 Olaniran A, Smith H, Unkels R, *et al.* Who is a community health worker? – a systematic review of definitions. *Global Health Action* 2017;10:1272223. doi:10.1080/16549716.2017.1272223
- 8 Han H-R, Song Y, Kim M, *et al.* Breast and Cervical Cancer Screening Literacy Among Korean American Women: A Community Health Worker–Led Intervention. *Am J Public Health* 2017;107:159–65. doi:10.2105/ajph.2016.303522
- 9 Richter RW, Bengen B, Alsup PA, *et al.* The community health worker. A resource for improved health care delivery. *Am J Public Health* 1974;64:1056–61. doi:10.2105/ajph.64.11.1056
- 10 Suen JJ, Han H-R, Peoples CY, *et al.* A Community Health Worker Training Program to Deliver Accessible and Affordable Hearing Care to Older Adults. *J Health Care Poor U* 2021;32:37–49. doi:10.1353/hpu.2021.0006
- 11 Kim K, Choi JS, Choi E, *et al.* Effects of Community-Based Health Worker Interventions to Improve Chronic Disease Management and Care Among Vulnerable Populations: A Systematic Review. *Am J Public Health* 2016;106:e3–28. doi:10.2105/ajph.2015.302987
- 12 Katigbak C, Devanter NV, Islam N, *et al.* Partners in Health: A Conceptual Framework for the Role of Community Health Workers in Facilitating Patients' Adoption of Healthy Behaviors. *Am J Public Health* 2015;105:872–80. doi:10.2105/ajph.2014.302411

- 1  
2  
3 13 The Sidney Kimmel Comprehensive Cancer Center Community Outreach and Engagement.  
4 [https://www.hopkinsmedicine.org/kimmel\\_cancer\\_center/community\\_outreach\\_engagement/](https://www.hopkinsmedicine.org/kimmel_cancer_center/community_outreach_engagement/)  
5 (accessed 5 Aug 2022).  
6
- 7 14 Anderson LM, Adeney KL, Shinn C, *et al.* Community coalition-driven interventions to reduce  
8 health disparities among racial and ethnic minority populations. *Cochrane Db Syst Rev*  
9 2015;6:CD009905. doi:10.1002/14651858.cd009905.pub2  
10
- 11 15 Bevans M, Castro K, Prince P, *et al.* An Individualized Dyadic Problem-Solving Education  
12 Intervention for Patients and Family Caregivers During Allogeneic Hematopoietic Stem Cell  
13 Transplantation. *Cancer Nurs* 2010;33:E24–32. doi:10.1097/ncc.0b013e3181be5e6d  
14  
15
- 16 16 Bevans M, Wehrle L, Castro K, *et al.* A problem-solving education intervention in caregivers  
17 and patients during allogeneic hematopoietic stem cell transplantation. *J Health Psychol*  
18 2014;19:602–17. doi:10.1177/1359105313475902  
19
- 20 17 W MJL, Bucher JA. The COPE Model. *J Psychosoc Oncol* 1999;16:93–117.  
21 doi:10.1300/j077v16n03\_07  
22
- 23 18 Houts PS, Nezu AM, Nezu CM, *et al.* The prepared family caregiver: a problem-solving  
24 approach to family caregiver education. *Patient Educ Couns* 1996;27:63–73. doi:10.1016/0738-  
25 3991(95)00790-3  
26  
27
- 28 19 Hwang S, Birken SA, Melvin CL, *et al.* Designs and methods for implementation research:  
29 Advancing the mission of the CTSA program. *J Clin Transl Sci* 2020;4:159–67.  
30 doi:10.1017/cts.2020.16  
31
- 32 20 Curran GM, Bauer M, Mittman B, *et al.* Effectiveness-implementation Hybrid Designs. *Med*  
33 *Care* 2012;50:217–26. doi:10.1097/mlr.0b013e3182408812  
34  
35
- 36 21 Baltimore City Health Department Community Health Assessment. 2017.  
37 [https://health.baltimorecity.gov/sites/default/files/health/attachments/Baltimore%20City%20CHA](https://health.baltimorecity.gov/sites/default/files/health/attachments/Baltimore%20City%20CHA%20-%20Final%209.20.17.pdf)  
38 [%20-%20Final%209.20.17.pdf](https://health.baltimorecity.gov/sites/default/files/health/attachments/Baltimore%20City%20CHA%20-%20Final%209.20.17.pdf)  
39
- 40 22 Rosenzweig MQ, Althouse AD, Sabik L, *et al.* The Association Between Area Deprivation  
41 Index and Patient-Reported Outcomes in Patients with Advanced Cancer. *Heal Equity*  
42 2021;5:8–16. doi:10.1089/heq.2020.0037  
43
- 44 23 Polit DF, Beck CT. *Essentials of Nursing Research 7th Edition*. Lippincott Williams & Wilkins  
45 2010.  
46
- 47 24 Brown QL, Elmi A, Bone L, *et al.* Community Engagement to Address Cancer Health  
48 Disparities: A Process EVALUATION using the Partnership Self-Assessment Tool. *Prog*  
49 *Community Heal Partnerships Res Educ Action* 2019;13:97–104. doi:10.1353/cpr.2019.0012  
50  
51
- 52 25 Mbah O, Ford JG, Qiu M, *et al.* Mobilizing social support networks to improve cancer  
53 screening: the COACH randomized controlled trial study design. *Bmc Cancer* 2015;15:907.  
54 doi:10.1186/s12885-015-1920-7  
55  
56  
57  
58  
59



1  
2  
3 26 Spagnola S, Zabora J, BrintzenhofeSzoc K, *et al*. The Satisfaction with Life Domains Scale  
4 for Breast Cancer (SLDS-BC). *Breast J* 2003;9:463–71. doi:10.1046/j.1524-4741.2003.09603.x

5  
6 27 Baker F, Curbow B, Wingard JR. Development of the Satisfaction with Life Domains Scale  
7 for Cancer. *J Psychosoc Oncol* 1993;10:75–90. doi:10.1300/j077v10n03\_05

8  
9 28 Harris PA, Taylor R, Thielke R, *et al*. Research electronic data capture (REDCap)—A  
10 metadata-driven methodology and workflow process for providing translational research  
11 informatics support. *J Biomed Inform* 2009;42:377–81. doi:10.1016/j.jbi.2008.08.010

12  
13 29 Harris PA, Taylor R, Minor BL, *et al*. The REDCap Consortium: Building an International  
14 Community of Software Platform Partners. *J Biomed Inform* 2019;95:103208.  
15 doi:10.1016/j.jbi.2019.103208

16  
17 30 Cooper LA. Training and Mentoring the Next Generation: Insights from the Field. *Ethnic Dis*  
18 2018;28:579–85. doi:10.18865/ed.28.4.579

19  
20 31 Cooper LA, Purnell TS, Showell NN, *et al*. Progress on Major Public Health Challenges: The  
21 Importance of Equity. *Public Health Rep* 2018;133:15S-19S. doi:10.1177/0033354918795164

22  
23 32 Cooper LA, Purnell TS, Ibe CA, *et al*. Reaching for Health Equity and Social Justice in  
24 Baltimore: The Evolution of an Academic-Community Partnership and Conceptual Framework to  
25 Address Hypertension Disparities. *Ethnic Dis* 2016;26:369–78. doi:10.18865/ed.26.3.369

26  
27 33 Freeman HP. The History, Principles, and Future of Patient Navigation: Commentary.  
28 *Seminars Oncol Nurs* 2013;29:72–5. doi:10.1016/j.soncn.2013.02.002

29  
30 34 Pérez LM, Martínez J. Community Health Workers: Social Justice and Policy Advocates for  
31 Community Health and Well-Being. *Am J Public Health* 2008;98:11–4.  
32 doi:10.2105/ajph.2006.100842

33  
34 35 Rocque GB, Pisu M, Jackson BE, *et al*. Resource Use and Medicare Costs During Lay  
35 Navigation for Geriatric Patients With Cancer. *Jama Oncol* 2017;3:817.  
36 doi:10.1001/jamaoncol.2016.6307

37  
38 36 Earp JA, Eng E, O'Malley MS, *et al*. Increasing Use of Mammography Among Older, Rural  
39 African American Women: Results From a Community Trial. *Am J Public Health* 2002;92:646–  
40 54. doi:10.2105/ajph.92.4.646

41  
42 37 Eng E, Smith J. Natural helping functions of lay health advisors in breast cancer education.  
43 *Breast Cancer Res Tr* 1995;35:23–9. doi:10.1007/bf00694741

## FIGURE LEGEND

**Figure 1.** Adapted Andersen's behavioral model for health care utilization. The CHW navigation program serves as an *enabling resource* for promoting appointment-keeping and follow-up (i.e., retention). In the model, the time to initial oncology treatment is defined as the time between the patient's first cancer diagnosis and the start of cancer treatment. Furthermore, health care utilization encompasses the provider's *recommended* use of health care services, and the number of oncology visits, number of missed oncology visits, mortality, number of hospitalizations, and length of hospital stay are used as a proxy to measure this concept.

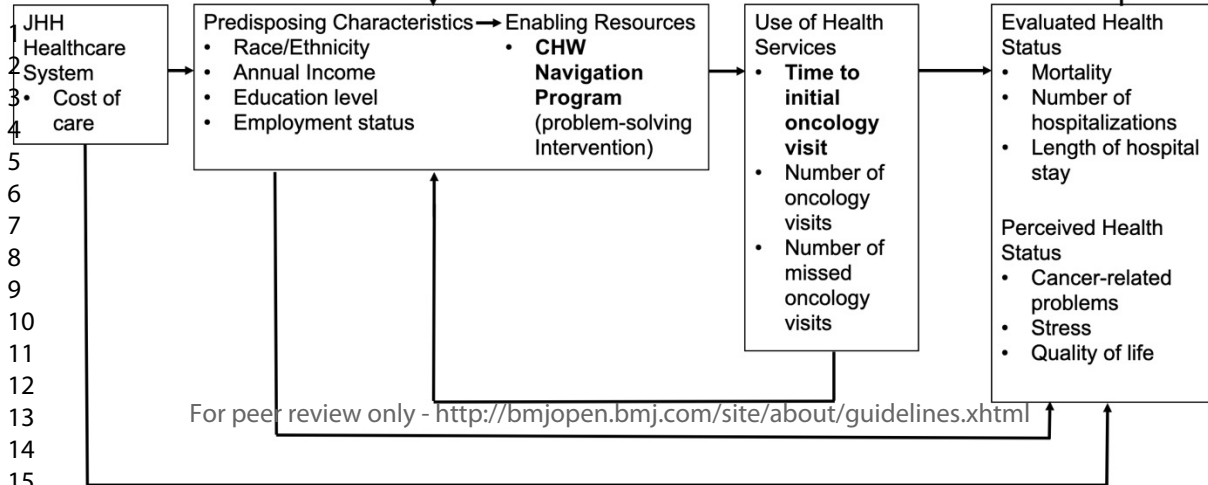

# BMJ Open

## Improving cancer care for underserved populations in an academic and community practice setting: protocol for a community health worker pilot navigation program

|                                 |                                                                                                                                                                                                                                                                                                                                                                                                                                                                                                                                                                                                                                                                                                                                                 |
|---------------------------------|-------------------------------------------------------------------------------------------------------------------------------------------------------------------------------------------------------------------------------------------------------------------------------------------------------------------------------------------------------------------------------------------------------------------------------------------------------------------------------------------------------------------------------------------------------------------------------------------------------------------------------------------------------------------------------------------------------------------------------------------------|
| Journal:                        | <i>BMJ Open</i>                                                                                                                                                                                                                                                                                                                                                                                                                                                                                                                                                                                                                                                                                                                                 |
| Manuscript ID                   | bmjopen-2022-067270.R1                                                                                                                                                                                                                                                                                                                                                                                                                                                                                                                                                                                                                                                                                                                          |
| Article Type:                   | Protocol                                                                                                                                                                                                                                                                                                                                                                                                                                                                                                                                                                                                                                                                                                                                        |
| Date Submitted by the Author:   | 25-Oct-2022                                                                                                                                                                                                                                                                                                                                                                                                                                                                                                                                                                                                                                                                                                                                     |
| Complete List of Authors:       | Suen, Jonathan; Johns Hopkins University, School of Nursing; Johns Hopkins University Bloomberg School of Public Health<br>Parrillo, Elaina; Johns Hopkins University, School of Nursing<br>Hassoon, Ahmed; Johns Hopkins Medicine; Johns Hopkins University Bloomberg School of Public Health<br>Peairs, Kimberly ; Johns Hopkins Medicine Sidney Kimmel Comprehensive Cancer Center; Johns Hopkins Medicine<br>Stanford, Olivia; Johns Hopkins Medicine Sidney Kimmel Comprehensive Cancer Center; Johns Hopkins Medicine<br>Wenzel, Jennifer; Johns Hopkins University, School of Nursing; Johns Hopkins Medicine Sidney Kimmel Comprehensive Cancer Center<br>Zabora, James; Johns Hopkins Medicine<br>Dobs, Adrian; Johns Hopkins Medicine |
| <b>Primary Subject Heading</b>: | Oncology                                                                                                                                                                                                                                                                                                                                                                                                                                                                                                                                                                                                                                                                                                                                        |
| Secondary Subject Heading:      | Health services research, Public health                                                                                                                                                                                                                                                                                                                                                                                                                                                                                                                                                                                                                                                                                                         |
| Keywords:                       | ONCOLOGY, Adult oncology < ONCOLOGY, PUBLIC HEALTH                                                                                                                                                                                                                                                                                                                                                                                                                                                                                                                                                                                                                                                                                              |
|                                 |                                                                                                                                                                                                                                                                                                                                                                                                                                                                                                                                                                                                                                                                                                                                                 |

SCHOLARONE™  
Manuscripts

1  
2  
3 **Improving cancer care for underserved populations in an academic and community**  
4 **practice setting: protocol for a community health worker pilot navigation program**  
5  
6  
7

8 \* Jonathan J. Suen AuD <sup>1,2</sup> (ORCID: 0000-0003-3658-7459)  
9

10 \* Elaina Parrillo BSN, RN <sup>1</sup> (ORCID: 0000-0001-6824-0017)  
11

12 Ahmed Hassoon MD, MPH <sup>3,6</sup>  
13

14 Kimberly S. Peairs MD <sup>4,5</sup>  
15

16 Olivia Stanford BS, BA <sup>5,6</sup>  
17

18 Jennifer Wenzel PhD, RN, CCM, FAAN <sup>1,5,6</sup>  
19

20 James Zabora ScD, MSW <sup>6</sup>  
21

22 Adrian Dobs MD, MHS <sup>6</sup>  
23

24 \* *Co-first authors*  
25  
26  
27

28 <sup>1</sup> Johns Hopkins University School of Nursing (Baltimore, Maryland, USA).  
29

30 <sup>2</sup> Cochlear Center for Hearing and Public Health, Johns Hopkins University Bloomberg School of  
31 Public Health (Baltimore, Maryland, USA).  
32

33 <sup>3</sup> Division of Cardiovascular and Clinical Epidemiology, Johns Hopkins University Bloomberg  
34 School of Public Health (Baltimore, Maryland, USA).  
35

36 <sup>4</sup> Division of General Internal Medicine, Johns Hopkins University School of Medicine,  
37 (Baltimore, Maryland, USA)  
38

39 <sup>5</sup> Johns Hopkins Sidney Kimmel Comprehensive Cancer Center, (Baltimore, Maryland, USA)  
40

41 <sup>6</sup> Johns Hopkins University School of Medicine (Baltimore, Maryland, USA).  
42  
43  
44  
45  
46  
47  
48

49 **Correspondence to:**

50 Jonathan J. Suen, AuD  
51 Johns Hopkins University School of Nursing  
52 525 N Wolfe St, Baltimore, MD 21205, USA  
53 [suen@jhmi.edu](mailto:suen@jhmi.edu)  
54

55 **Word Count:** 3,986 (4,000 max)  
56  
57  
58  
59  
60

## ABSTRACT

**Introduction:** Delaying cancer treatment following diagnosis impacts health outcomes, including increasing patient distress and odds of mortality. Interventions to promote timely health care engagement may decrease patient-reported stress and improve quality-of-life. Community health workers (CHWs) represent an *enabling resource* for reducing delays in attending initial oncology treatment visits. As part of an ongoing program evaluation coordinated by the Merck Foundation, we will implement a pilot navigation program comprising CHW-conducted needs assessments for supporting patients and their caregivers. We aim to investigate (1) the program's influence on patients' health care utilization within the period between their first diagnosis to initial treatment visit, and (2) the logistic feasibility and acceptability of program implementation.

**Methods and analysis:** We will employ a hybrid implementation design to introduce the CHW navigation program at the Johns Hopkins Sidney Kimmel Comprehensive Cancer Center. CHW team members will use a consecutive sampling approach. Participants will complete the Problem-Checklist, Chronic Illness Distress Scale, and the Satisfaction with Life Domains instruments. CHWs will provide tailored guidance by sharing information available on the Johns Hopkins Electronic Resource databases. The investigators will evaluate patients' time to initial oncology treatment and health care utilization through reviewing electronic medical records at three- and six-months post-intervention. Bivariate analyses will be completed to evaluate the relationships between receiving the program and all outcome measures.

**Ethics and dissemination:** This study's protocol was approved by the Johns Hopkins School of Medicine's institutional review board (IRB00160610). Informed consent will be obtained by phone by the CHW navigator. Dissemination planning is ongoing through regular meetings between members of the investigator team and public members of two community advisory

1  
2  
3 groups (CAGs). Study plans include collaborating with other experts from the Johns Hopkins  
4  
5 Institute for Clinical and Translational Research and the Johns Hopkins Center for Health Equity  
6  
7 for ideating dissemination strategies.  
8  
9  
10  
11  
12

13 **Keywords:** cancer, community health workers, health equity, patient navigation, quality of life  
14  
15  
16  
17  
18  
19  
20  
21  
22  
23  
24  
25  
26  
27  
28  
29  
30  
31  
32  
33  
34  
35  
36  
37  
38  
39  
40  
41  
42  
43  
44  
45  
46  
47  
48  
49  
50  
51  
52  
53  
54  
55  
56  
57  
58  
59  
60

For peer review only

## STRENGTHS AND LIMITATIONS OF THIS STUDY

- The pilot intervention was translated from an established model of care (i.e., community health worker) with robust evidence in the scientific literature showing efficacy in addressing a variety of health conditions among populations that are underserved.
- Our targeted sampling strategy, based upon assessing area deprivation index scores, directed priority attention to populations residing in local zip codes with higher levels of poverty, substandard housing, and unemployment.
- The study design and implementation plan emerged through partnership and collaboration between academic investigators and members from a long-established community advisory group (CAG).
- The target sample will be a heterogeneous population given the lack of an exclusion criterion based on cancer type.
- The pilot intervention was developed within the unique infrastructure of the Johns Hopkins Sidney Kimmel Comprehensive Cancer Center (SKCCC), and the intervention design may therefore be neither feasible nor acceptable within other health care systems and patient populations, respectively.



## INTRODUCTION

Reliable health care utilization during the period between a cancer diagnosis and receiving initial treatment is crucial for facilitating favorable outcomes. Prolonging the start of treatment leads to poorer outcomes such as patient distress, worsening the progression of disease, and increasing the odds of mortality [1–3]. The average length of time for receiving initial cancer treatment has increased over time, highlighting a public health concern warranting attention. Khorana et al. found a 38% increase in the time to initial cancer treatment following diagnosis across all cancer types in the United States between 2004-2013, using the data from the National Cancer Database [2]. Additionally, patients who identified as Black had an increased time to initial treatment compared to white counterparts across cancer types [2]. Although the exact cause of this increase in time to initial treatment following first cancer diagnosis is unclear, this delay is likely influenced by a combination of patient- and system-level factors [1,4].

Andersen's behavioral model for health care utilization can guide investigators' understanding of how patient- and system-level factors can affect timely access for initiating cancer treatments [5]. This model posits that patients' health care utilization is a function of combined factors across the environment, including the health care system, along with population- and individual-level patient characteristics that either enables or impedes certain health behaviors and use of health services [5]. This in turn is theorized to impact health outcomes adversely. Therefore, the model may inform novel program designs for reaching underserved demographics, such as patients with low income and/or from minoritized racial backgrounds, who may otherwise face higher risks for unfavorable outcomes due to structural and/or other social barriers associated with the environment and/or population characteristics [5].

In Andersen's behavioral model (Figure 1), *enabling resources* are key components for supporting and promoting timely treatment initiation and health care utilization by patients. One

1  
2  
3 *enabling resource* for patients and their caregivers are community health worker (CHW) models  
4 of care, which commonly comprises trained lay individuals or paraprofessionals who serve as  
5 important linkages between patient populations and health care systems [6,7]. Some examples  
6  
7 of public health programs adapting CHW models include community-based interventions for  
8  
9 improving breast and cervical cancer screenings among Korean American women [8], health  
10  
11 service outreach for residents with history of stroke and hypertension in Harlem, New York  
12  
13 (USA) [9], and providing a socially accessible hearing care program for older adults with hearing  
14  
15 loss and low-to-moderate income in Baltimore, Maryland (USA) [10]. Evidence gathered through  
16  
17 a systematic review of CHW-directed interventions reported treatment efficacy when compared  
18  
19 with certain conventional models of health care and were cost-effective for managing certain  
20  
21 health conditions [11]. Trained CHWs often share varied degrees of either language, culture,  
22  
23 lived experiences, and/or geographic characteristics with their patient populations. The social  
24  
25 concordance between CHWs and patient populations is a hallmark feature of CHW-directed  
26  
27 programs, which can be optimized for providing patient-centered services [12]. Health systems,  
28  
29 particularly ones with community-based partnerships like the Johns Hopkins Sidney Kimmel  
30  
31 Comprehensive Cancer Center (SKCCC) [13], can therefore also leverage CHW models as an  
32  
33 *enabling resource* for addressing public health disparities [14].  
34  
35  
36  
37  
38  
39  
40

41 The goal of the CHW navigation program involves conducting a needs assessment and  
42 focusing on problem-solving for navigating the health care system. Prior studies of interventions  
43 focused on problem orientation and problem-solving with cancer patients and their caregivers  
44 have yielded evidence of promoting self-efficacy in managing care and in reducing stress [15–  
45  
46  
47  
48  
49  
50  
51  
52  
53  
54  
55  
56  
57  
58  
59  
60

1  
2  
3 Hopkins Hospital system (JHH) includes the SKCCC, which has a centralized call center for  
4 scheduling appointments regardless of cancer type and JHH provider team. Working through  
5 the SKCCC allows the intervention team to reach a broader range of new patients with various  
6 cancer diagnoses.  
7  
8  
9  
10

11  
12 Our protocol manuscript describes a pilot program featuring a CHW-directed needs  
13 assessment and health care navigation services. We will assess the program's influence on  
14 patients' treatment initiation and health care utilization, as well as the feasibility of program  
15 implementation. We hypothesized that implementing the program would decrease the time  
16 leading up to the patient's initial oncology treatment visit following their first cancer diagnosis.  
17  
18 Secondary hypotheses include observing an increase in the total number of oncology provider  
19 visits (e.g., patient retention), improvements in self-reported quality of life, and a decrease in the  
20 number of emergency department visits, hospitalizations, missed oncology appointments,  
21 reported stress, and premature mortality attributed to delaying care.  
22  
23  
24  
25  
26  
27  
28  
29  
30

## 31 **METHODS AND ANALYSIS**

### 32 **Study design and hypotheses**

33  
34  
35 This pilot study will be a pre-test/post-test, hybrid effectiveness-implementation type-1 research  
36 design [19,20]. This design will evaluate the effectiveness of the pilot CHW navigation program  
37 in facilitating patients' initiation of cancer treatment, health care utilization for oncology care, and  
38 perceived health status (patient stress and quality of life). Additional objectives include  
39 assessing the feasibility of technical and administrative processes in implementing such a  
40 program (e.g., recruitment using electronic medical record data, number of staff personnel  
41 needed, etc.), as well as the acceptability of program for informing a larger-scale intervention  
42 study in the future. Feasibility and acceptability are key features to consider in addition to  
43  
44  
45  
46  
47  
48  
49  
50  
51  
52  
53  
54  
55  
56  
57  
58  
59  
60

effectiveness of the program to understand how the intervention may be incorporated into practice at the SKCCC [21].

The following hypotheses will assess the impact of the pilot CHW navigation program:

1) The CHW navigation program will promote timely initiation of cancer treatment following the patient's first cancer diagnosis.

1a) The program will *decrease* time leading up to the initial oncology treatment visit.

2) The CHW navigation program will facilitate patient's health care utilization for recommended cancer care and treatment.

2a) The program will *decrease* the number of emergency department visits, hospitalizations, and missed oncology appointments

2b) The program will *increase* the total number of provider-recommended oncology visits (mitigating health care overutilization).

3) The CHW navigation program will improve patients' perceived health status.

3a) The program will *decrease* patient-reported stress.

3b) The program will *increase* patient-reported quality of life.

This protocol previously underwent a scientific peer review by subject matter experts with support from the Merck Foundation (proposal #19-9714). The SKCCC-based program is part of a broader network of initiatives across six cancer centers coordinated through the Alliance to Advance Patient-Centered Cancer Care, henceforth referred to as the "Alliance" [22].

### **Study setting and sample**

1  
2  
3 We will implement a CHW-directed needs assessment and navigation program among patients  
4 newly diagnosed with cancer. Health disparities within Baltimore City are well-documented with  
5 population life expectancies across local zip codes differing by as much as 20 years [23].  
6  
7

8  
9 Patients will be consecutively sampled from nine zip codes in East Baltimore (21202, 21205,  
10 21206, 21212, 21213, 21218, 21224, 21231, and 21239). These areas within East Baltimore  
11 show high incidences of cancer mortality and area deprivation index (ADI) scores. Rather than  
12 relying solely on race or ethnicity as proxy indicators of social factors associated with poorer  
13 health outcomes, we will utilize ADI to incorporate a more holistic approach (i.e., incorporating  
14 social and structural factors) in reaching underserved demographics. Area deprivation index  
15 scores are calculated using sociodemographic characteristics of a neighborhood. Individuals  
16 living in neighborhoods with high ADI scores experience higher levels of poverty, mortality rates,  
17 substandard housing, unemployment, and lower levels of educational attainment [22]. Patients  
18 living in areas with higher ADIs are also more likely to have lower levels of health literacy, as  
19 literacy levels are associated with the social factors used to calculate ADI [24].  
20  
21  
22  
23  
24  
25  
26  
27  
28  
29  
30  
31  
32

33 Patients will be eligible to participate if they present with their first cancer diagnosis and  
34 are over 18 years old. Patients must be seeking cancer care in the JHH system and have  
35 previously contacted the SKCCC for an appointment. Recruitment will follow a consecutive  
36 sampling strategy [25], and all eligible patients will be contacted by phone for study recruitment  
37 by a two-member CHW team affiliated with the SKCCC. Through a review of the JHH Epic  
38 electronic medical health record data, there are approximately 2,155 SKCCC patients over the  
39 age of 18 with a first-time cancer diagnosis who meet inclusion criteria for recruitment.  
40  
41  
42  
43  
44  
45  
46  
47  
48

### 49 **Patient and public involvement**

50  
51 The SKCCC prioritizes community engagement strategies for outreach and improving public  
52 trust in medical care [13]. The investigator team maintains a partnership with two community  
53 advisory groups (CAGs) coordinated by the SKCCC based in Baltimore City and Prince  
54  
55  
56  
57  
58  
59  
60

1  
2  
3 George's County (Maryland, USA), respectively, that were established over ten years ago  
4 [26,27]. The CAGs meet monthly and comprise stakeholders from across the continuum of  
5 cancer care, including cancer survivors, caregivers, and representatives from local health  
6 departments, community-based organizations, and local faith-based communities. While CAG  
7 meetings are hosted by the SKCCC, their respective priorities and agendas are self-directed  
8 and self-managed by its membership. The CAGs contribute to research and practice through  
9 advising clinicians and researchers at SKCCC about patient and caregiver priorities such as  
10 barriers in accessing care and priority outcomes [13]. Members are invited to weigh in on study  
11 designs, implementation plans, approaches in data analysis and interpretation, and the  
12 dissemination of study results.  
13  
14  
15  
16  
17  
18  
19  
20  
21  
22  
23

24  
25 Approximately three months prior to implementing the CHW navigator pilot program,  
26 investigators from the National Cancer Institute (NCI)-supported Johns Hopkins Center to  
27 Reduce Cancer Disparities (JHCRCD) began engaging the CAGs about the current program  
28 following members' reports of unique challenges in accessing care following the first cancer  
29 diagnosis. The CAGs also identified issues related to maintaining contact with a care team and  
30 a lack of transportation as barriers to care and contributors to increased stress levels, which  
31 directly informed the current study's priorities, outcomes-of-interest (stress and quality-of-life),  
32 and intervention development. The investigator team continues to meet regularly with the CAGs,  
33 who in turn also support recruitment efforts by promoting the study within their respective social  
34 networks.  
35  
36  
37  
38  
39  
40  
41  
42  
43  
44  
45

#### 46 **Intervention: community health worker (CHW) navigation program**

47  
48  
49 The CHW navigation program will be provided to patients and caregivers to address cancer  
50 care-related problems during the period between first diagnosis and the initial treatment visit.  
51 The CHW navigation program adopts the C.O.P.E model to provide patients and caregivers with  
52 guidance and expert information. The C.O.P.E. model includes four principles: Creativity,  
53  
54  
55  
56  
57  
58  
59  
60

1  
2  
3 Optimism, Planning, and Expert information. It focuses on social problem-solving for both the  
4 patient and family caregiver(s) to optimize problem orientation and problem-solving [15,17,18].  
5  
6 The C.O.P.E. model has been widely documented in the scientific literature with oncology  
7 patients and their caregivers to assist with problem-solving. The CHW navigation program  
8 incorporates these principles of C.O.P.E. to empower and engage patients and caregivers in  
9 their care. The implementation of the CHW navigation program is intended to influence patients'  
10 health care utilization, as well as stress and quality of life.  
11  
12  
13  
14  
15  
16  
17

18 The CHW team from SKCCC will contact eligible patients or their caregivers to assess  
19 interests in participating before obtaining informed consent. Upon enrolling, the CHWs will ask  
20 patients a series of scripted questions as a needs assessment. The questions asked will be  
21 tailored to whether the patient already received a confirmed diagnosis via biopsy report. This  
22 allows a more flexible approach for the delivery of the program and helps tailor the intervention  
23 accordingly for the respective needs of different patients and/or caregivers. This flexibility was  
24 prioritized by the Alliance to accommodate the unique infrastructures and capacities of the six  
25 NCI-designated cancer centers within the project's network [22], and represents an important  
26 feature of many complex interventions [21,28,29]. For patients who do not have a biopsy-  
27 confirmed diagnosis on record, the CHW will facilitate scheduling a biopsy visit, as needed, and  
28 direct patients to the appropriate JHH department for follow-up care (e.g., Surgery, Medical  
29 Oncology, or Radiation Therapy). The patient can leave the navigation program if they decide to  
30 seek cancer care elsewhere, or if the CHW is unable to meet the patient's specific needs at that  
31 time. All points of contact with patients and/or caregivers throughout the program will be  
32 documented as encounter notes by the CHW navigators.  
33  
34  
35  
36  
37  
38  
39  
40  
41  
42  
43  
44  
45  
46  
47  
48  
49

50 Alternatively, CHWs will focus on scheduling the initial appointment with oncology for  
51 patients who have a biopsy-confirmed diagnosis on record. During a call, the CHW will identify  
52 any barriers inhibiting the patient from scheduling their first oncology visit. This may include  
53  
54  
55  
56  
57  
58  
59  
60

logistical barriers, such as a lack of transportation, childcare, or understanding how to use MyChart, an online personal health record system used to schedule appointments, view medications and test results, and connect with providers. The CHW may also identify psycho-emotional barriers, such as fear, mistrust, or a lack of support. After the CHW identifies these barriers, they will connect the patient with the appropriate online community resources from Johns Hopkins Electronic Resource databases. The CHW may initiate discussions for scheduling either an in-home or office visit for the patient's initial oncology treatment, if appropriate. CHWs will anticipate and prepare for multiple phone calls with patients who have more complex needs to provide sufficient information and navigation support.

### Outcome of interests

The primary outcome is time to the initial treatment visit following a cancer diagnosis. Secondary outcome variables include health care utilization at three- and six-months after the completion of the program, cost of care, number of problems resolved, number of community resources used, stress, and quality of life (QOL). The acceptability of the program by patient and caregiver populations will be assessed by the established CAGs through semi-structured discussions hosted by the investigator team. Members from the CAGs vetted all proposed questionnaires and procedures before receiving formal approval from a research ethics review board and the project sponsor. See Table 1 for specific short- and long-term outcome variables.

**Table 1. Short- and long-term outcome variables**

|                                        | Variable               | Measurement                              |
|----------------------------------------|------------------------|------------------------------------------|
| <b>Short-term Outcomes<sub>1</sub></b> | Cancer-related problem | Problem-Checklist (25-item)              |
|                                        | Stress                 | Chronic Illness Distress Scale (7-item)  |
|                                        | Quality of Life        | Satisfaction with Life Domains (16-item) |



|                                                                                                                                                                        |                                                                                                                                 |                                                                                                                                                                                                                                                                                                                                                  |
|------------------------------------------------------------------------------------------------------------------------------------------------------------------------|---------------------------------------------------------------------------------------------------------------------------------|--------------------------------------------------------------------------------------------------------------------------------------------------------------------------------------------------------------------------------------------------------------------------------------------------------------------------------------------------|
| <b>Long-term outcomes<sub>2</sub></b>                                                                                                                                  | Time to first oncology treatment visit <sub>3</sub><br><br>Healthcare utilization <sub>3</sub><br><br>Cost of care <sub>3</sub> | Time to first oncology treatment visit following patient's cancer-confirmed biopsy<br><br>Number of ED visits<br><br>Number of hospitalizations<br><br>Length of hospital stay<br><br>Mortality<br><br>Number of oncology visits (telehealth/in-person)<br><br>Number of missed oncology visits<br><br>Pharmacy charges<br><br>Radiology charges |
| <sub>1</sub> During CHW Navigation Program Contact; <sub>2</sub> Three-Month and 6-Month post-program; <sub>3</sub> Data provided from Epic (electronic health record) |                                                                                                                                 |                                                                                                                                                                                                                                                                                                                                                  |

## Instruments

The time to initial oncology treatment visit and health care utilization data will be obtained from Epic, an electronic medical record database. Time to initial oncology treatment visit is defined as the time from the patient's biopsy-confirmed diagnosis to their first oncology treatment. Health care utilization encompasses the number of oncology visits (via telehealth or in-person), missed oncology visits, emergency department (ED) visits, hospitalizations and length of hospital stay, and patient mortality. The cost of care (e.g., pharmacy and radiology charges) will also be tracked through reviewing data from Epic.

The current study will utilize the following instruments as directed by the Alliance for harmonizing outcomes across the six cancer centers [22]. The Problem-Checklist is a 25-item inventory of problems cancer patients have reported during and after diagnosis and treatment. The Problem-Checklist will assist in identifying problems to focus on during the intervention. To

1  
2  
3 measure quality of life, the patient will complete the Satisfaction with Life Domains Scale, a 16-  
4 item scale. The scale uses a seven-point Likert rating system, ranging from 1 (most satisfied) to  
5 7 (most dissatisfied). This scale was previously used with breast cancer survivors and patients  
6 who received bone marrow transplants and were positively received by both patient populations  
7 [30,31]. The Chronic Illness Distress scale will measure stress. This scale is a 16-item, four-  
8 point Likert scale ranging from *not upset* to *very upset*. These brief questionnaires will be  
9 completed upon entry into the program with interim follow-up data collected at three- and six-  
10 months.  
11  
12

13  
14 Patient sociodemographic information will be collected using a Patient Demographics  
15 Questionnaire. This questionnaire includes items about age, marital status, race/ethnicity,  
16 education, employment status, annual household income, cancer diagnosis, and time of  
17 diagnosis.  
18  
19

### 20 21 22 23 24 25 26 27 28 29 30 31 32 33 34 35 36 37 38 39 40 41 42 43 44 45 46 47 48 49 50 51 52 53 54 55 56 57 58 59 60

**Data collection**

Short-term outcome variables will be collected by CHW team members during the first series of  
phone calls with the participant. CHWs will review each questionnaire with the participant and  
record their responses. Each CHW will also maintain a journal of interactions (encounter notes)  
with participants, detailing the participant's problem, resources used to address the problem,  
who they spoke with (patient or informal/formal caregiver), and the number of phone calls made.  
All data will be secured in accordance with university policies for upholding study confidentiality.  
Long-term outcome variables will be collected through Epic and stored in REDCap. REDCap  
(Research Electronic Data Capture) is a secure, web-based software platform designed to  
support data capture for research studies, providing (1) an intuitive interface for validated data  
capture; (2) audit trails for tracking data manipulation and export procedures; (3) automated  
export procedures for seamless data downloads to common statistical packages; and (4)  
procedures for data integration and interoperability with external sources [32,33]. For assessing

1  
2  
3 the low-cost feature of the CHW navigation program, our team will document the resources  
4 expended during implementation such as staffing hours and costs of communication resources.  
5  
6 We will also document the number of patients served by the program to demonstrate our reach.  
7  
8  
9

### 10 **Analytic plan**

11  
12 We will collect all measures (Table 1) before and after implementation of the CHW Navigation  
13 Program. CHWs will collect information by phone through the Problem Checklist, Chronic Illness  
14 Distress scale, and Satisfaction with Life Domains scale before providing guidance on cancer-  
15 related problem(s). Additionally, we will assess the time to the initial oncology treatment visit  
16 and health care utilization through evaluating data from Epic at three- and six-months following  
17 the program. Data analyses will occur at each timepoint of data collection (baseline and post-  
18 program; immediate, three-months, and six-months). Univariate analyses will be completed to  
19 describe the sample. Bivariate analyses will be completed to understand relationships between  
20 receipt of the program and all outcome variables. We will use independent t-tests to assess the  
21 program's impact on participant stress, quality of life, number of problems reported, and health  
22 care utilization. We will use repeated paired t-tests (under a Bonferroni correction) on the  
23 following: average pre-test to each post-test data collection point for distress, severity of  
24 symptoms, and problem-solving behaviors. Additional paired t-tests will be conducted to  
25 determine if there is a difference in the same variables over time.  
26  
27  
28  
29  
30  
31  
32  
33  
34  
35  
36  
37  
38  
39  
40  
41  
42

### 43 **ETHICS AND DISSEMINATION**

44  
45 This study completed an ethical review through the Johns Hopkins School of Medicine's  
46 institutional review board (IRB00160610) and received initial approval on August 1, 2019. This  
47 study includes an IRB-approved informed consent process where we will obtain oral consent by  
48 phone from each participant prior to enrollment in the program. At the time of this writing (2022),  
49 the current protocol is approved through July 6, 2023, coinciding with the projected study  
50  
51  
52  
53  
54  
55  
56  
57  
58  
59  
60

1  
2  
3 conclusion after confronting implementation delays due to local public health guidelines  
4 implemented during the COVID-19/SARS-CoV-2 pandemic which restricted research and  
5 clinical activities at SKCCC. Discussions surrounding the study's dissemination plans are  
6 ongoing through regular meetings between members of the investigator team (JHCRCD) and  
7 members of the public (CAGs). The JHCRCD and CAGs together will also be collaborating with  
8 other entities such as the Johns Hopkins Institute for Clinical and Translational Research and  
9 the Johns Hopkins Center for Health Equity (formerly the Johns Hopkins Center to Eliminate  
10 Cardiovascular Health Disparities) [34,35], who offer additional expertise drawn from experience  
11 in forging academic-community partnerships for study conduct and disseminating findings [36].  
12  
13  
14  
15  
16  
17  
18  
19  
20  
21  
22

## 23 **DISCUSSION**

24  
25 We will implement a pilot CHW navigation program to support patient populations in Baltimore  
26 who face higher risk of delaying initial cancer treatment visits or becoming lost to follow-up  
27 throughout the care continuum. Our sampling strategy targets residents of select urban zip  
28 codes with high ADI scores where patients are more likely to confront barriers to timely health  
29 care engagement [37] and are less likely to participate in research studies [38], attributed to  
30 respective social determinants of health. CHWs have been shown to be effective in improving  
31 access and engagement with health care in underserved populations [6,39] and are well  
32 positioned to support cancer patients in reducing the time to initial cancer treatment.  
33  
34  
35  
36  
37  
38  
39  
40  
41  
42

43 The CHW will serve as a linkage between patients newly diagnosed with cancer and  
44 their oncology provider team at the JHH. As an *enabling resource* for supporting cancer care  
45 utilization by patient populations facing higher risks for adverse outcomes, a CHW navigation  
46 program also supports pathways for promoting health equity. Like other CHW models of care,  
47 the health worker does not directly provide medical consultation nor primary care. Rather, they  
48 are trained to identify patients' and caregivers' needs and support problem-solving skills for  
49 navigating their health care. The CHWs also provide support by connecting patients to relevant  
50  
51  
52  
53  
54  
55  
56  
57  
58  
59  
60

1  
2  
3 resources and help coordinate care with the goal of reducing time to initiating treatment. Since  
4 health care utilization during the time between first diagnosis and initial treatment represents a  
5 critical period that can significantly modify health outcomes, reducing this time improves the  
6 prospects of survivorship and experiencing a better quality of life.  
7  
8  
9  
10

11  
12 There will be several limitations worth noting in implementing this program. Firstly, there  
13 will be no exclusion criterion based on cancer type. This results in a heterogeneous sample of  
14 patients with varying needs; some may require several contacts with a CHW to sense adequate  
15 support while others may only require one point of contact. Secondly, only patients who have  
16 previously contacted the SKCCC will be reached, thus introducing population selection bias to  
17 consider. Inherent structural factors that impede access to health systems such as the SKCCC  
18 should also be considered when designing programs aiming to address barriers to cancer care.  
19 Furthermore, our program is connecting patients who are still early in their cancer care  
20 trajectory, and therefore may not yet be knowledgeable enough to articulate their complete  
21 needs to the CHW. However, engagements with a CHW navigator still offer an initial point of  
22 linkage to resources that patients and caregivers may access during relevant periods later in  
23 their care trajectory. Finally, the program will be operating within the context of the JHH system  
24 and therefore other institutions with different infrastructures may benefit from considering  
25 another implementation strategy.  
26  
27  
28  
29  
30  
31  
32  
33  
34  
35  
36  
37  
38  
39  
40  
41

42 Our CHW navigation program represents an innovative approach to address disparities  
43 early in cancer care and supports the odds of survivorship by leveraging a model commonly  
44 used for reaching underserved patient populations [40]. The role of the CHW has proliferated  
45 due to demonstrated effectiveness in community outreach, social support, informal counseling,  
46 and health education [41]. The paraprofessional workforce is associated with improved care  
47 access and reduced health care costs [6,42], particularly among socially minoritized populations  
48 [43,44]. While the CHW navigation program will be based within JHH, conducting outreach to  
49  
50  
51  
52  
53  
54  
55  
56  
57  
58  
59  
60

1  
2  
3 patients who are not *yet* fully integrated within the health care system presents another unique  
4  
5 advantage. Patients usually need to be completely onboarded before being eligible to receive  
6  
7 navigation services by either a trained CHW or staff nurse. Our hospital based CHW, who may  
8  
9 also be perceived as more approachable than health care providers by patients, serves as a  
10  
11 linkage with patients in the Baltimore community *before* they spend the additional time usually  
12  
13 needed for integrating with a health care team. Waiting for patients to be fully onboarded before  
14  
15 receiving navigation services may otherwise risk further delaying initial treatment. The CHW  
16  
17 navigator therefore operates within a “transitional space” for patients in their care trajectory  
18  
19 when they may face higher risk of becoming lost to follow-up due to barriers in health care  
20  
21 systems, including those attributable to legacies of structural racism. A CHW navigator may also  
22  
23 provide further assurance for a medical provider team who would know that their patients can  
24  
25 remain better connected to vital health care through the CHW-directed service. Finally, a CHW  
26  
27 navigation program may also represent a lower-cost approach [6,42] in reaching underserved  
28  
29 demographics with cancer diagnoses. Resources for operating such a program include properly  
30  
31 allocating staff hours (including time for CHW training, program delivery, and continuing  
32  
33 education as needed), adequate workspaces, and communications equipment. Taken together,  
34  
35 we propose our CHW navigation program for cancer care as a cost-effective approach to  
36  
37 facilitate better outcomes for both patients, their caregivers, and the health care system.  
38  
39  
40

41  
42 We will pilot our novel CHW navigation program and evaluate its logistic feasibility and  
43  
44 acceptability among populations with recent cancer diagnoses who are traditionally underserved  
45  
46 by health care systems in Baltimore City. Our program represents an *enabling resource* [5] to  
47  
48 support health care utilization for patients and their caregivers during a critical period when  
49  
50 initiating treatment by oncology in a timely manner is crucial for favorable outcomes. Our  
51  
52 program protocol describes key guiding frameworks, program features, and an analytic plan that  
53  
54 we aim to follow for implementation.  
55  
56  
57  
58  
59  
60

1  
2  
3  
4  
5  
6  
7  
8  
9  
10  
11  
12  
13  
14  
15  
16  
17  
18  
19  
20  
21  
22  
23  
24  
25  
26  
27  
28  
29  
30  
31  
32  
33  
34  
35  
36  
37  
38  
39  
40  
41  
42  
43  
44  
45  
46  
47  
48  
49  
50  
51  
52  
53  
54  
55  
56  
57  
58  
59  
60

For peer review only

## Declarations

## Competing interests

The authors declare that they have no competing interests.

## Funding

This work was coordinated through the Alliance to Advance Patient-Centered Cancer Care, with support from the Merck Foundation (proposal #19-9714), after a competitive call for Alliance-affiliated projects with program oversight from a designated National Program Office within the University of Michigan School of Nursing. JJS is supported in part by the National Institute on Aging/National Institutes of Health (F31AG071353) and the Johns Hopkins Cochlear Center for Hearing and Public Health, which is supported in part by a philanthropic gift from Cochlear, Ltd. The funders listed above have no role in both the conduct and outcomes of the study.

## Contributors

All authors contributed to the conceptualization of this manuscript (JJS, EP, AH, KP, OS, JW, JRZ, ASD). JJS and EP drafted the manuscript as co-first authors and all other authors contributed substantial feedback and writing for revisions, including a member of the CHW team at SKCCC (OS). ASD and JRZ advised the manuscript's development as co-senior authors and principal investigators of the grant awarded by the Merck Foundation.

## Acknowledgements

The authors would like to acknowledge the support of the Merck Foundation in this program of research. The authors would also like to acknowledge Dr. Debra Roter and Ms. Marielle (Mari) Bugayong for their guidance and expertise.



## References

1. Cone EB, Marchese M, Paciotti M, *et al.* Assessment of Time-to-Treatment Initiation and Survival in a Cohort of Patients With Common Cancers. *Jama Netw Open* 2020;3:e2030072. doi:10.1001/jamanetworkopen.2020.30072
2. Khorana AA, Tullio K, Elson P, *et al.* Time to initial cancer treatment in the United States and association with survival over time: An observational study. *Plos One* 2019;14:e0213209. doi:10.1371/journal.pone.0213209
3. Doubeni CA, Gabler NB, Wheeler CM, *et al.* Timely follow-up of positive cancer screening results: A systematic review and recommendations from the PROSPR Consortium. *Ca Cancer J Clin* 2018;68:199–216. doi:10.3322/caac.21452
4. Hanna TP, King WD, Thibodeau S, *et al.* Mortality due to cancer treatment delay: systematic review and meta-analysis. *Bmj* 2020;371:m4087. doi:10.1136/bmj.m4087
5. Andersen RM. Revisiting the behavioral model and access to medical care: does it matter? *J Health Soc Behav* 1995;36:1–10.
6. Witmer A, Seifer SD, Finocchio L, *et al.* Community health workers: integral members of the health care work force. *Am J Public Health* 1995;85:1055–8. doi:10.2105/ajph.85.8\_pt\_1.1055
7. Olaniran A, Smith H, Unkels R, *et al.* Who is a community health worker? – a systematic review of definitions. *Global Health Action* 2017;10:1272223. doi:10.1080/16549716.2017.1272223
8. Han H-R, Song Y, Kim M, *et al.* Breast and Cervical Cancer Screening Literacy Among Korean American Women: A Community Health Worker–Led Intervention. *Am J Public Health* 2017;107:159–65. doi:10.2105/ajph.2016.303522
9. Richter RW, Bengen B, Alsup PA, *et al.* The community health worker. A resource for improved health care delivery. *Am J Public Health* 1974;64:1056–61. doi:10.2105/ajph.64.11.1056
10. Suen JJ, Han H-R, Peoples CY, *et al.* A Community Health Worker Training Program to Deliver Accessible and Affordable Hearing Care to Older Adults. *J Health Care Poor U* 2021;32:37–49. doi:10.1353/hpu.2021.0006
11. Kim K, Choi JS, Choi E, *et al.* Effects of Community-Based Health Worker Interventions to Improve Chronic Disease Management and Care Among Vulnerable Populations: A Systematic Review. *Am J Public Health* 2016;106:e3–28. doi:10.2105/ajph.2015.302987
12. Katigbak C, Devanter NV, Islam N, *et al.* Partners in Health: A Conceptual Framework for the Role of Community Health Workers in Facilitating Patients' Adoption of Healthy Behaviors. *Am J Public Health* 2015;105:872–80. doi:10.2105/ajph.2014.302411

- 1  
2  
3 13. The Sidney Kimmel Comprehensive Cancer Center Community Outreach and Engagement.  
4 [https://www.hopkinsmedicine.org/kimmel\\_cancer\\_center/community\\_outreach\\_engagement/](https://www.hopkinsmedicine.org/kimmel_cancer_center/community_outreach_engagement/)  
5 (accessed 5 Aug 2022).  
6
- 7 14. Anderson LM, Adeney KL, Shinn C, *et al*. Community coalition-driven interventions to  
8 reduce health disparities among racial and ethnic minority populations. *Cochrane Db Syst Rev*  
9 2015;6:CD009905. doi:10.1002/14651858.cd009905.pub2  
10
- 11 15. Bevans M, Castro K, Prince P, *et al*. An Individualized Dyadic Problem-Solving Education  
12 Intervention for Patients and Family Caregivers During Allogeneic Hematopoietic Stem Cell  
13 Transplantation. *Cancer Nurs* 2010;33:E24–32. doi:10.1097/ncc.0b013e3181be5e6d  
14  
15
- 16 16. Bevans M, Wehrle L, Castro K, *et al*. A problem-solving education intervention in  
17 caregivers and patients during allogeneic hematopoietic stem cell transplantation. *J Health*  
18 *Psychol* 2014;19:602–17. doi:10.1177/1359105313475902  
19
- 20 17. W MJL, Bucher JA. The COPE Model. *J Psychosoc Oncol* 1999;16:93–117.  
21 doi:10.1300/j077v16n03\_07  
22
- 23 18. Houts PS, Nezu AM, Nezu CM, *et al*. The prepared family caregiver: a problem-solving  
24 approach to family caregiver education. *Patient Educ Couns* 1996;27:63–73. doi:10.1016/0738-  
25 3991(95)00790-3  
26  
27
- 28 19. Hwang S, Birken SA, Melvin CL, *et al*. Designs and methods for implementation research:  
29 Advancing the mission of the CTSA program. *J Clin Transl Sci* 2020;4:159–67.  
30 doi:10.1017/cts.2020.16  
31
- 32 20. Curran GM, Bauer M, Mittman B, *et al*. Effectiveness-implementation Hybrid Designs. *Med*  
33 *Care* 2012;50:217–26. doi:10.1097/mlr.0b013e3182408812  
34  
35
- 36 21. Skivington K, Matthews L, Simpson SA, *et al*. A new framework for developing and  
37 evaluating complex interventions: update of Medical Research Council guidance. *Bmj*  
38 2021;374:n2061. doi:10.1136/bmj.n2061  
39
- 40 22. Hoeve ESV, Simon MA, Danner SM, *et al*. Implementing patient navigation programs:  
41 Considerations and lessons learned from the Alliance to Advance Patient-Centered Cancer  
42 Care. *Cancer* 2022;128:2806–16. doi:10.1002/cncr.34251  
43
- 44 23. Baltimore City Health Department Community Health Assessment. 2017.  
45 [https://health.baltimorecity.gov/sites/default/files/health/attachments/Baltimore%20City%20CHA](https://health.baltimorecity.gov/sites/default/files/health/attachments/Baltimore%20City%20CHA%20-%20Final%209.20.17.pdf)  
46 [%20-%20Final%209.20.17.pdf](https://health.baltimorecity.gov/sites/default/files/health/attachments/Baltimore%20City%20CHA%20-%20Final%209.20.17.pdf)  
47
- 48 24. Literacy I of M (US) C on H. *Health Literacy: A Prescription to End Confusion*. Washington  
49 (DC): National Academies Press (US) 2004. doi:10.17226/10883  
50
- 51 25. Polit DF, Beck CT. *Essentials of Nursing Research 7th Edition*. Lippincott Williams & Wilkins  
52 2010.  
53  
54  
55  
56  
57  
58  
59

- 1  
2  
3 26. Brown QL, Elmi A, Bone L, *et al.* Community Engagement to Address Cancer Health  
4 Disparities: A Process EVALUATION using the Partnership Self-Assessment Tool. *Prog*  
5 *Community Heal Partnerships Res Educ Action* 2019;13:97–104. doi:10.1353/cpr.2019.0012  
6  
7 27. Mbah O, Ford JG, Qiu M, *et al.* Mobilizing social support networks to improve cancer  
8 screening: the COACH randomized controlled trial study design. *Bmc Cancer* 2015;15:907.  
9 doi:10.1186/s12885-015-1920-7  
10  
11 28. Craig P, Cooper C, Gunnell D, *et al.* Using natural experiments to evaluate population health  
12 interventions: new Medical Research Council guidance. *J Epidemiol Commun H* 2012;66:1182.  
13 doi:10.1136/jech-2011-200375  
14  
15 29. Moore GF, Audrey S, Barker M, *et al.* Process evaluation of complex interventions: Medical  
16 Research Council guidance. *Bmj Br Medical J* 2015;350:h1258. doi:10.1136/bmj.h1258  
17  
18 30. Spagnola S, Zabora J, BrintzenhofeSzoc K, *et al.* The Satisfaction with Life Domains Scale  
19 for Breast Cancer (SLDS-BC). *Breast J* 2003;9:463–71. doi:10.1046/j.1524-4741.2003.09603.x  
20  
21 31. Baker F, Curbow B, Wingard JR. Development of the Satisfaction with Life Domains Scale  
22 for Cancer. *J Psychosoc Oncol* 1993;10:75–90. doi:10.1300/j077v10n03\_05  
23  
24 32. Harris PA, Taylor R, Thielke R, *et al.* Research electronic data capture (REDCap)—A  
25 metadata-driven methodology and workflow process for providing translational research  
26 informatics support. *J Biomed Inform* 2009;42:377–81. doi:10.1016/j.jbi.2008.08.010  
27  
28 33. Harris PA, Taylor R, Minor BL, *et al.* The REDCap Consortium: Building an International  
29 Community of Software Platform Partners. *J Biomed Inform* 2019;95:103208.  
30 doi:10.1016/j.jbi.2019.103208  
31  
32 34. Cooper LA. Training and Mentoring the Next Generation: Insights from the Field. *Ethnic Dis*  
33 2018;28:579–85. doi:10.18865/ed.28.4.579  
34  
35 35. Cooper LA, Purnell TS, Showell NN, *et al.* Progress on Major Public Health Challenges: The  
36 Importance of Equity. *Public Health Rep* 2018;133:15S-19S. doi:10.1177/0033354918795164  
37  
38 36. Cooper LA, Purnell TS, Ibe CA, *et al.* Reaching for Health Equity and Social Justice in  
39 Baltimore: The Evolution of an Academic-Community Partnership and Conceptual Framework to  
40 Address Hypertension Disparities. *Ethnic Dis* 2016;26:369–78. doi:10.18865/ed.26.3.369  
41  
42 37. Martires KJ, Kurlander DE, Minwell GJ, *et al.* Patterns of cancer screening in primary care  
43 from 2005 to 2010. *Cancer* 2014;120:253–61. doi:10.1002/cncr.28403  
44  
45 38. Halbert CH, Jefferson M, Allen CG, *et al.* Racial Differences in Patient Portal Activation and  
46 Research Enrollment Among Patients With Prostate Cancer. *Jco Clin Cancer Informatics*  
47 2021;5:768–74. doi:10.1200/cci.20.00131  
48  
49 39. Wells KJ, Battaglia TA, Dudley DJ, *et al.* Patient navigation: State of the art or is it science?  
50 *Cancer* 2008;113:1999–2010. doi:10.1002/cncr.23815  
51  
52  
53  
54  
55  
56  
57  
58  
59

- 1  
2  
3 40. Freeman HP. The History, Principles, and Future of Patient Navigation: Commentary.  
4 *Seminars Oncol Nurs* 2013;29:72–5. doi:10.1016/j.soncn.2013.02.002  
5  
6 41. Pérez LM, Martínez J. Community Health Workers: Social Justice and Policy Advocates for  
7 Community Health and Well-Being. *Am J Public Health* 2008;98:11–4.  
8 doi:10.2105/ajph.2006.100842  
9  
10 42. Rocque GB, Pisu M, Jackson BE, *et al.* Resource Use and Medicare Costs During Lay  
11 Navigation for Geriatric Patients With Cancer. *Jama Oncol* 2017;3:817.  
12 doi:10.1001/jamaoncol.2016.6307  
13  
14 43. Earp JA, Eng E, O'Malley MS, *et al.* Increasing Use of Mammography Among Older, Rural  
15 African American Women: Results From a Community Trial. *Am J Public Health* 2002;92:646–  
16 54. doi:10.2105/ajph.92.4.646  
17  
18 44. Eng E, Smith J. Natural helping functions of lay health advisors in breast cancer education.  
19 *Breast Cancer Res Tr* 1995;35:23–9. doi:10.1007/bf00694741  
20  
21  
22  
23  
24  
25  
26  
27  
28  
29  
30  
31  
32  
33  
34  
35  
36  
37  
38  
39  
40  
41  
42  
43  
44  
45  
46  
47  
48  
49  
50  
51  
52  
53  
54  
55  
56  
57  
58  
59  
60

## FIGURE LEGEND

### Figure 1. Adapted Andersen's behavioral model for health care utilization

The CHW navigation program serves as an *enabling resource* for promoting appointment-keeping and follow-up (i.e., retention). In the model, the time to initial oncology treatment is defined as the time between the patient's first cancer diagnosis and the start of cancer treatment. Furthermore, health care utilization encompasses the provider's *recommended use* of health care services, and the number of oncology visits, number of missed oncology visits, mortality, number of hospitalizations, and length of hospital stay are used as a proxy to measure this concept.

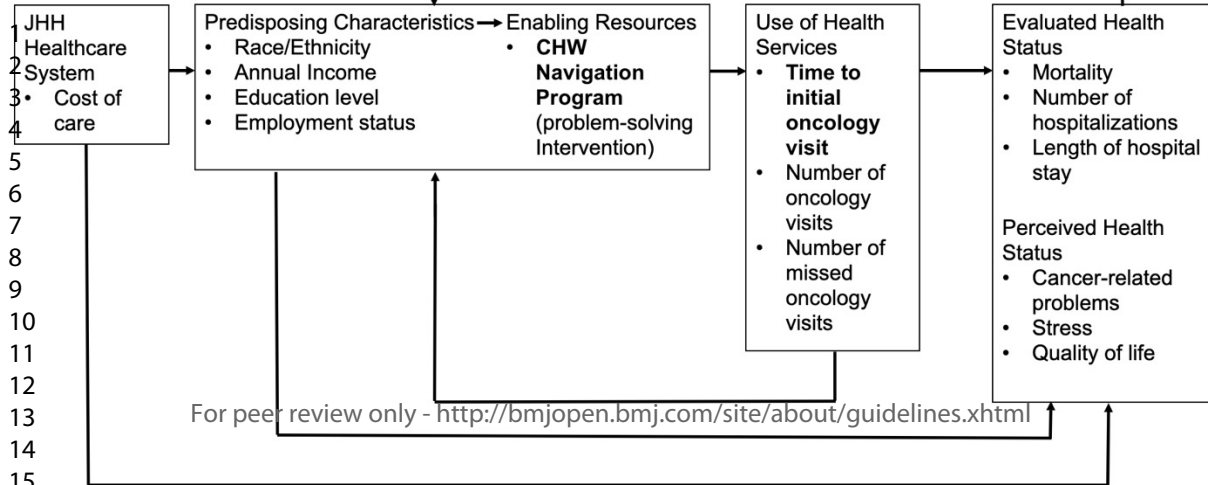

Supplement: bmjopen-2022-067270.draft_revisions.pdf [file bmjopen-2022-067270.draft_revisions.pdf]
